# Supplementary material for: Motifs in the tau protein that control binding to microtubules and aggregation determine pathological effects
Source: PubMed Central journal article supplement (PMC5648870; doi:10.1038/s41598-017-13786-2), 2017-10-19
Supplement: 41598_2017_13786_MOESM1_ESM.pdf [file 41598_2017_13786_MOESM1_ESM.pdf]

# **Motifs in the tau protein that control binding to microtubules and aggregation determine pathological effects**

Aurélien Lathuilière<sup>1#</sup>, Pamela Valdés<sup>1#</sup>, Stéphanie Papin<sup>2,4</sup>, Matthias Cacquevel<sup>1</sup>, Catherine Maclachlan<sup>3</sup>, Graham W. Knott<sup>3</sup>, Andreas Muhs<sup>2</sup>, Paolo Paganetti<sup>2,4</sup>, Bernard L. Schneider<sup>1\*</sup>

## **Supplementary information**

Supplementary Figure S1

Supplementary Figure S2

## Supplementary Figure S1

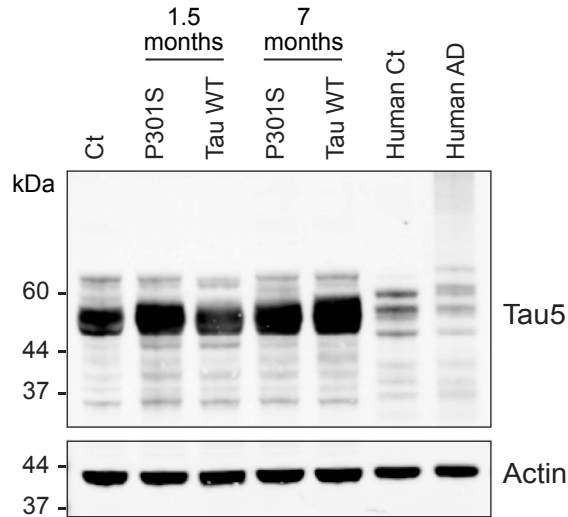

### **Supplementary Figure S1. Total tau expression in the forebrain of mice injected with AAV-tau**

The amount of total tau protein (mouse and human) is assessed by western blot using the Tau5 antibody in mouse forebrain protein homogenates at 1.5 and 7 months after vector injection. Ct: control AAV-maxFP injection. Protein extracts from human brain cortex from a control (Human Ct) and Alzheimer's patient (Human AD) are shown in the last two lanes for comparison. Actin is shown as loading control.

## Supplementary Figure S2

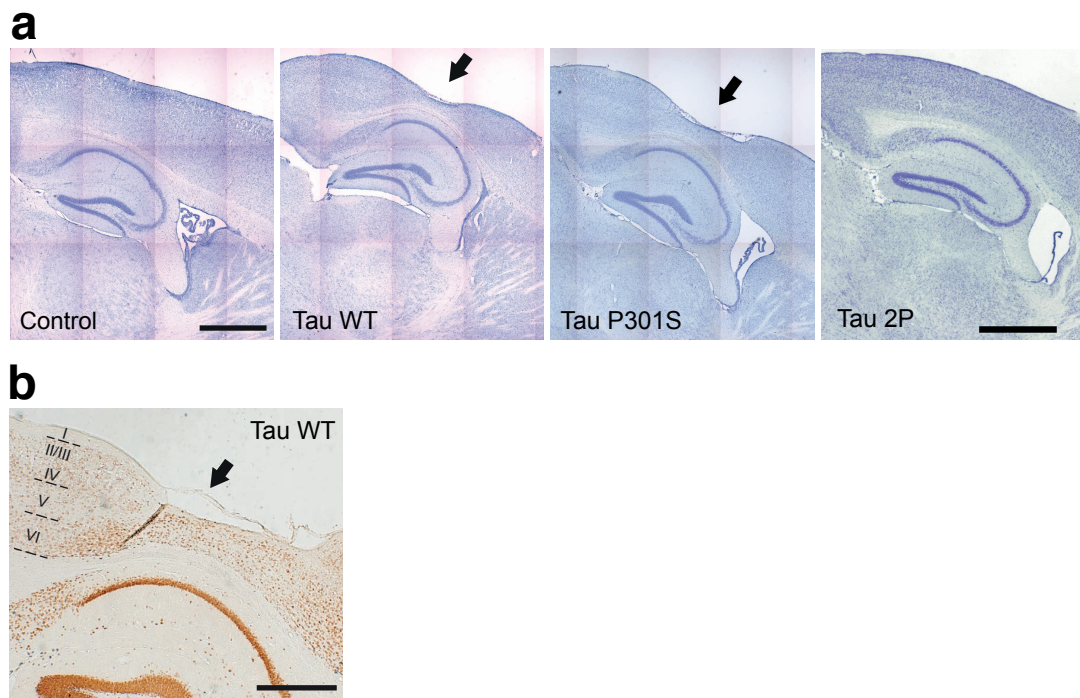

### Supplementary Figure S2. Human tau overexpression triggers neurodegeneration in mouse cortex

**a)** Representative cresyl violet staining in sagittal brain sections, 3 months after AAV injection. Arrows indicate an evident thinning of the cortex observed in the mice injected with AAV-WT and AAV-P301S. Scale bar: 1 mm. **b)** Representative NeuN immunolabeling in a sagittal brain section of an AAV-WT injected mouse. Cortical layers are indicated by roman numerals. Note the extensive degeneration of the most superficial cortical layers. Scale bar: 500  $\mu\text{m}$ .
